# Supplementary material for: Near Unity PLQY and High Stability of Barium Thiocyanate Based All-Inorganic Perovskites and Their Applications in White Light-Emitting Diodes
Source: MDPI journal article supplement (doi:10.3390/photonics8060209), 2021-06-09
Supplement: s1 [file s1]

*Supplementary Material for*

**Near Unity PLQY and High Stability of Barium Thiocyanate based All-Inorganic Perovskites and their Applications in White Light-Emitting Diodes**

Gopi Chandra Adhikari, Saroj Thapa, Yang Yue, Hongyang Zhu, and Peifen Zhu\*

Department of Physics and Engineering Physics, The University of Tulsa, Tulsa, OK 74104, United States

\*Email: [peifen-zhu@utulsa.edu](mailto:peifen-zhu@utulsa.edu) (P.Z.)

**Table S1.** FWHM of diffraction peak ( $\beta$ ), dislocation density ( $\delta$ ), and micro-strain ( $\epsilon$ ) of CsPbBr<sub>3</sub> NCs with addition of different molar concentrations of Ba(SCN)<sub>2</sub>.

| Ba(SCN) <sub>2</sub><br>(%) | FWHM of diffraction peak $\beta$<br>(radians) | Dislocation density $\delta$<br>$\times 10^{-3}$ (nm <sup>-2</sup> ) | Micro-strain $\epsilon$<br>$\times 10^{-4}$ |
|-----------------------------|-----------------------------------------------|----------------------------------------------------------------------|---------------------------------------------|
| 0                           | 0.0217                                        | 22.95                                                                | 14.73                                       |
| 5                           | 0.0198                                        | 18.92                                                                | 13.38                                       |
| 15                          | 0.0177                                        | 15.17                                                                | 11.98                                       |
| 20                          | 0.0156                                        | 11.76                                                                | 10.59                                       |
| 30                          | 0.0153                                        | 11.29                                                                | 10.37                                       |
| 40                          | 0.0151                                        | 11.03                                                                | 10.26                                       |
| 50                          | 0.0158                                        | 12.24                                                                | 10.80                                       |

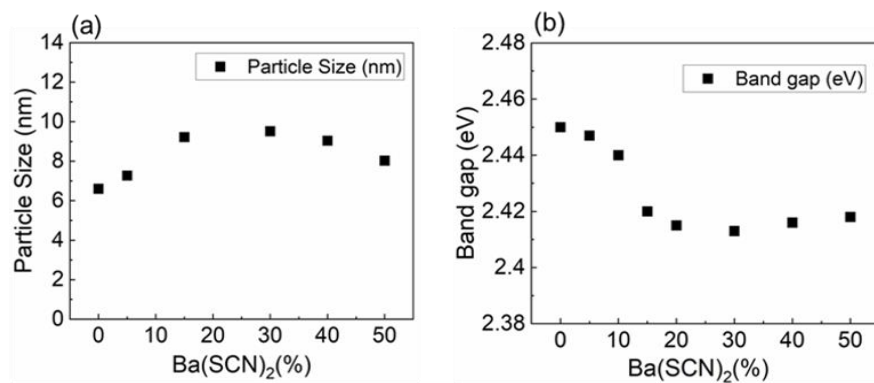

**Figure S1.** The variation of (a) particle size and (b) band gap of CsPbBr<sub>3</sub> NCs with addition of different molar concentrations of Ba(SCN)<sub>2</sub>.

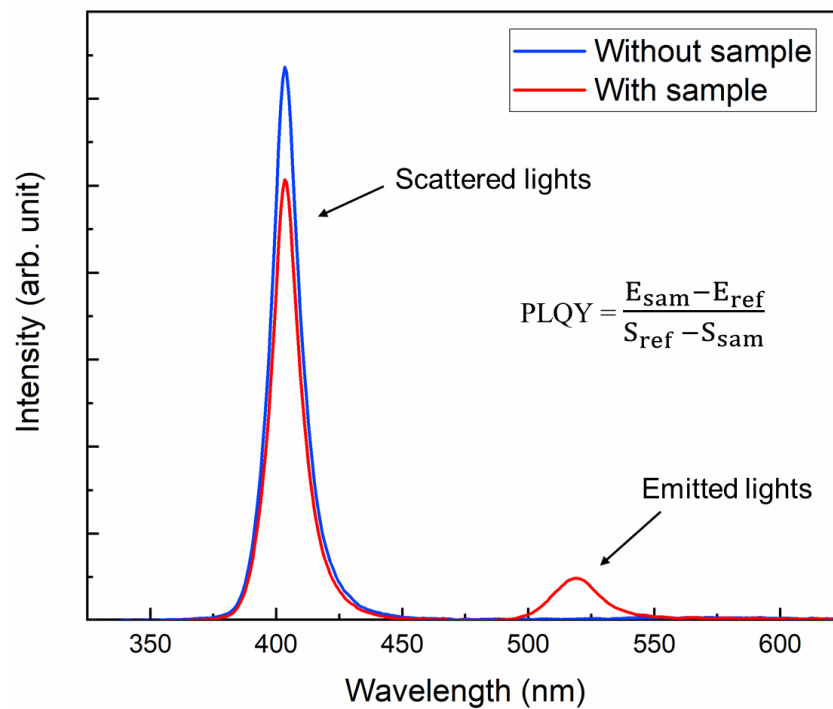

**Figure S2.** Scattering and emission spectra with and without samples. The absolute PLQY is calculated using the formula demonstrated in the inset of the Figure S2.  $S_{ref}$  and  $E_{ref}$  are area covered by scattering and emission spectra of reference liquid on the X-axis, and  $S_{sam}$  and  $E_{sam}$  are area covered by scattering and emission spectra of sample in reference liquid (toluene).

**Table S2.** Time variation of PLQY of CsPbBr<sub>3</sub> NCs with addition of different molar concentrations of Ba(SCN)<sub>2</sub>.

| <b>Ba(SCN)<sub>2</sub><br/>(%)</b> | <b>PLQY (%)<br/>Fresh Sample</b> | <b>PLQY (%)<br/>After 30 days</b> | <b>PLQY (%)<br/>After 60 days</b> | <b>PLQY (%)<br/>After 176 days</b> |
|------------------------------------|----------------------------------|-----------------------------------|-----------------------------------|------------------------------------|
| 0                                  | 72                               | 15                                | 13                                | 10                                 |
| 5                                  | 75                               | 73                                | 72                                | 53                                 |
| 15                                 | 75                               | 73                                | 73                                | 72                                 |
| 20                                 | 74                               | 71                                | 71                                | 69                                 |
| 30                                 | 83                               | 80                                | 79                                | 78                                 |
| 40                                 | 88                               | 84                                | 83                                | 81                                 |
| 50                                 | 98                               | 95                                | 94                                | 90                                 |

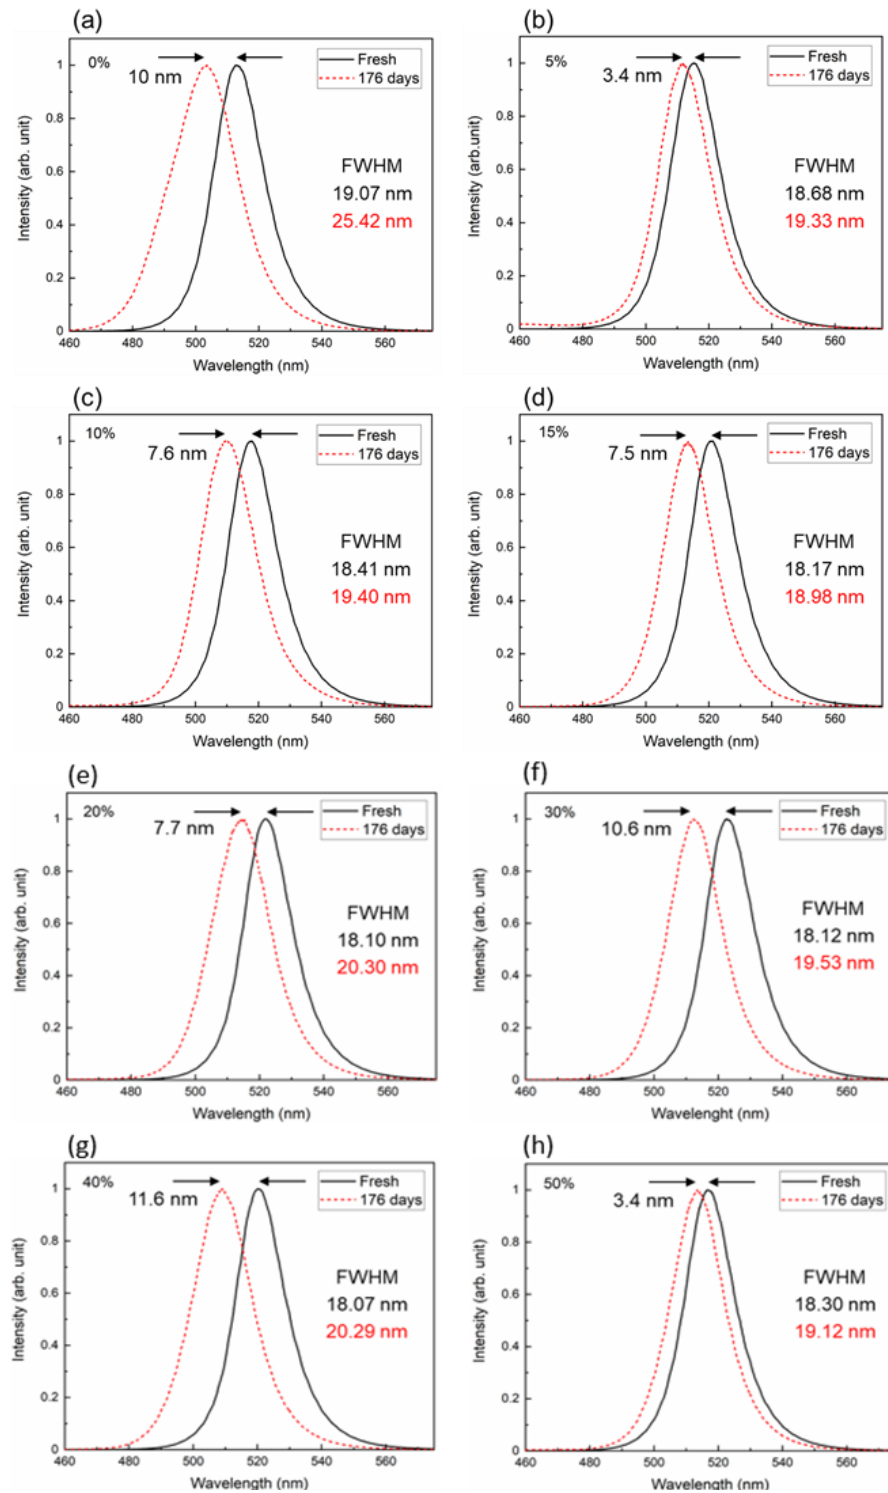

**Figure S3.** Normalized PL emission spectra of fresh and aged (+ 176 days in an ambient atmosphere) CsPbBr<sub>3</sub> NCs with different molar concentrations of Ba(SCN)<sub>2</sub> as indicated. The graph illustrates a blue-shift in PL emission peak position with an increasing storage time.

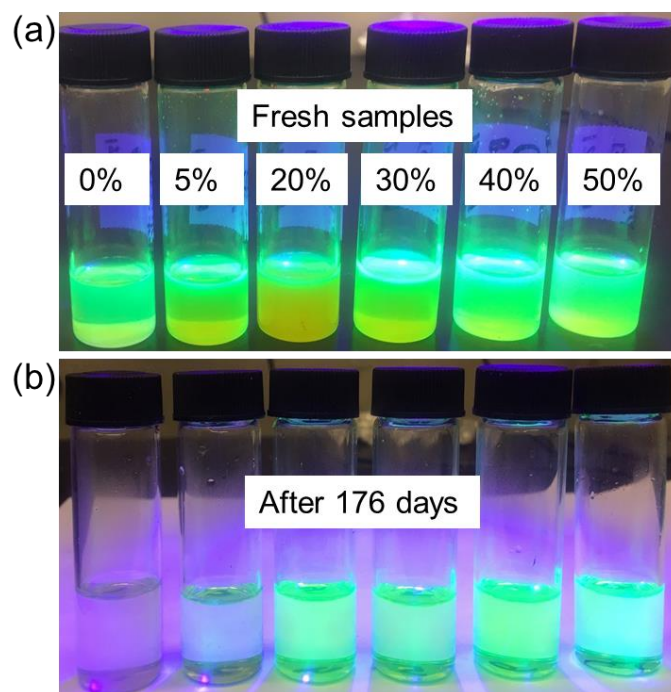

**Figure S4.** Digital photographs (under the UV light) of the colloidal solution of CsPbBr<sub>3</sub> NCs at different molar concentrations of Ba(SCN)<sub>2</sub>. (a) Fresh samples and (b) 176 days aged samples in an ambient atmosphere.

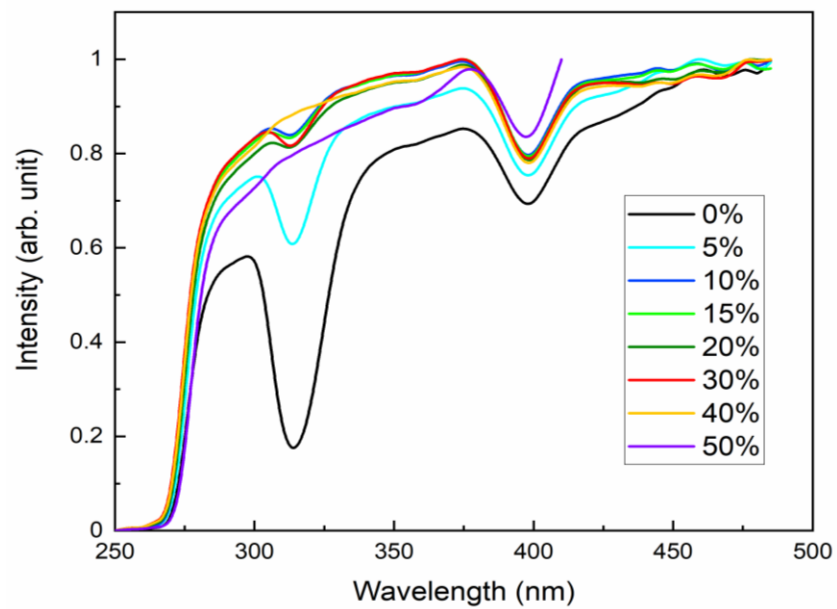

**Figure S5.** Normalized excitation spectra of CsPbBr<sub>3</sub> NCs at different molar concentrations of Ba(SCN)<sub>2</sub>.
